# Supplementary material for: Efficient ternary organic photovoltaics incorporating a graphene-based porphyrin molecule as a universal electron cascade material
Source: Royal Society of Chemistry journal article supplement (doi:10.1039/c5nr05113d), 2015-01-01
Supplement: c5nr05113d1.pdf [file c5nr05113d1.pdf]

## Electronic Supplementary Information (ESI)

### Nanoscale

# Efficient ternary organic photovoltaics incorporating graphene-based porphyrin molecule as a universal electron cascade material

M. M. Stylianakis,<sup>a,b\*</sup> D. Konios,<sup>a,b</sup> G. Kakavelakis,<sup>a,c</sup> G. Charalambidis,<sup>d</sup> E. Stratakis,<sup>c,e</sup>  
A. G. Coutsolelos,<sup>d\*</sup> E. Kymakis<sup>a\*</sup> and S. H. Anastasiadis<sup>b,e</sup>

<sup>a</sup>Center of Materials Technology and Photonics & Electrical Engineering Department, School of Applied Technology, Technological Educational Institute (TEI) of Crete, Heraklion, 71004, Crete, Greece.

<sup>b</sup>Dept. of Chemistry, Univ. of Crete, Heraklion, 71003 Crete, Greece.

<sup>c</sup>Dept. of Materials Science and Technology, Univ. of Crete, Heraklion, 71003 Crete, Greece.

<sup>d</sup>Laboratory of Bioinorganic Chemistry, Chemistry Department, University of Crete, Voutes Campus, 71003 Heraklion, Greece

<sup>e</sup>Institute of Electronic Structure and Laser (IESL), Foundation for Research and Technology-Hellas (FORTH).

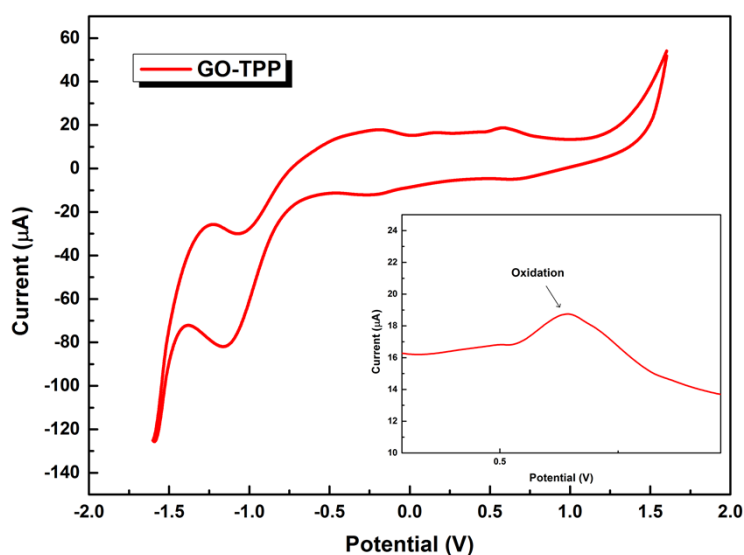

**Fig. S1** Cyclic voltammetry curve of GO-TPP, synthesized after 72 h, in CH<sub>3</sub>CN using 0.1 M Tetrabutylammonium hexafluorophosphate (TBAPF6) as the electrolyte, at a scan rate of 10 mV s<sup>-1</sup> (Inset: Oxidation peak of GO-TPP).

**Table S1** HOMO and LUMO values for different GO-TPP samples as measured by CV.

| Reaction Time | HOMO (eV) | LUMO (eV) |
|---------------|-----------|-----------|
| 24            | -5.17     | -4.74     |
| 48            | -5.38     | -4.42     |
| 60            | -5.51     | -4.34     |
| 72            | -5.63     | -4.25     |
| 96            | -6.07     | -4.12     |

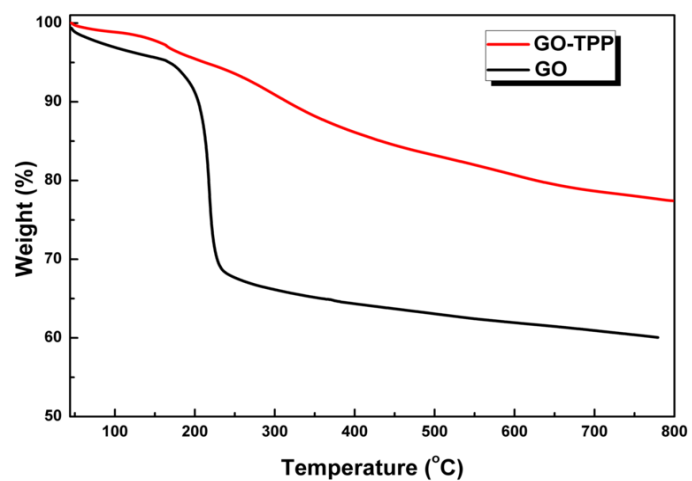

Fig. S2 Thermogravimetric Analysis. TGA curves of GO (black) and GO-TPP (red)

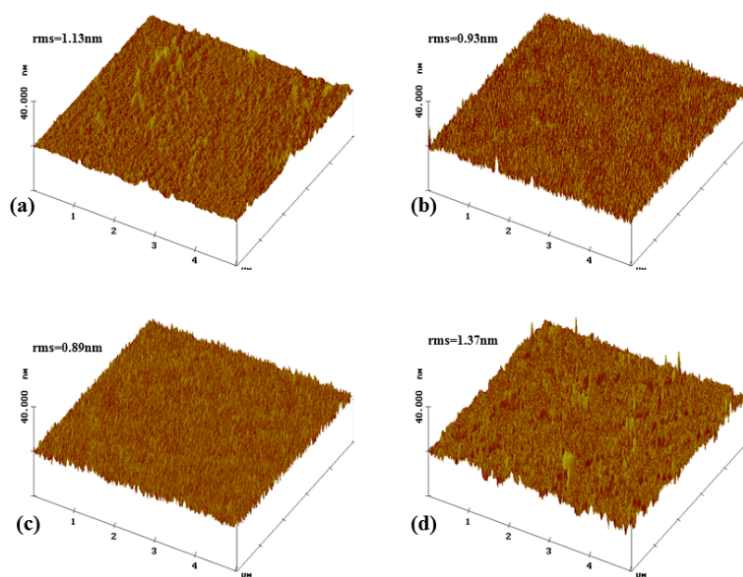

Fig. S3 AFM micrographs and rms values of PCDTBT:PC<sub>71</sub>BM active layer (a) without and with (b) 0.1%, (c) 0.3%, (d) 0.5% GO-TPP content.

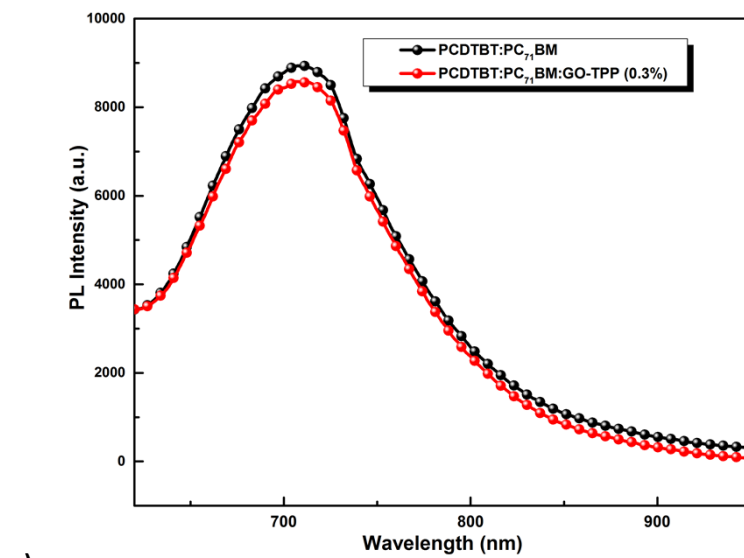

a)

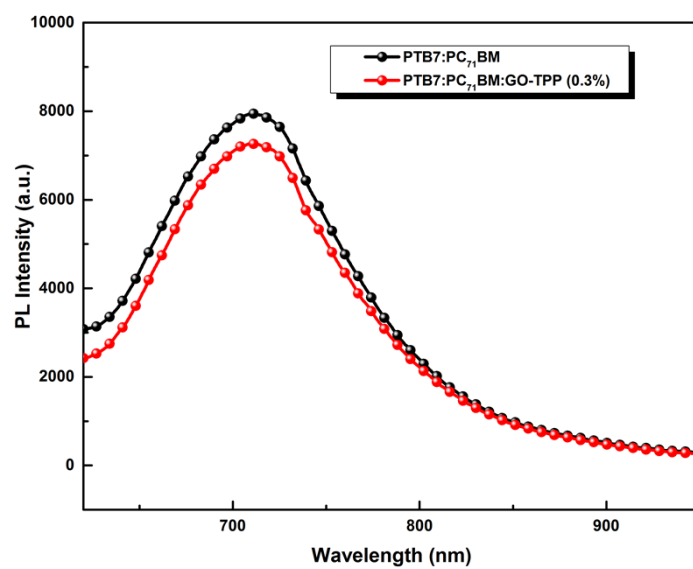

b)

Fig. S4 Photoluminescence (PL) spectra of the active layer based on a) PCDTBT:GO-TPP:PC<sub>71</sub>BM (0.3%) and b) PTB7:GO-TPP:PC<sub>71</sub>BM (0.3%).
